# Supplementary material for: A co-expressed gene status of adenylate kinase 1/4 reveals prognostic gene signature associated with prognosis and sensitivity to EGFR targeted therapy in lung adenocarcinoma
Source: PubMed Central journal article supplement (PMC6707279; doi:10.1038/s41598-019-48243-9), 2019-08-23

1 **Supplementary information**

2 A co-expressed gene status of adenylate kinase 1/4 reveals prognostic gene  
3 signature associated with prognosis and sensitivity to EGFR targeted therapy  
4 in lung adenocarcinoma

5

6 Yi-Hua Jan<sup>1\*</sup>, Tsung-Ching Lai<sup>1\*</sup>, Chih-Jen Yang<sup>2</sup>, Ming-Shyan Huang<sup>4#</sup>, and  
7 Michael Hsiao<sup>1, 3#</sup>

8

9 <sup>1</sup>Genomics Research Center, Academia Sinica, Taipei, Taiwan, <sup>2</sup> Department  
10 of Internal Medicine, Kaohsiung Medical University Hospital, School of  
11 Medicine, Kaohsiung Medical University, Kaohsiung, Taiwan, <sup>3</sup>Department of  
12 Biochemistry, College of Medicine, Kaohsiung Medical University, Kaohsiung,  
13 Taiwan. <sup>4</sup>School of Medicine, I-Shou University, Kaohsiung, Taiwan.

14

15 \*The first two authors contribute equally to this works.

16 #The last two authors are senior authors and contribute equally to this works.

17

18 Correspondence to: Dr. Michael Hsiao, Genomics Research Center, Academic  
19 Sinica, 128 Academia Road, Section 2, Taipei 115, Taiwan. Phone: 886-2-  
20 2787-1243; Fax: 886-2-2789-9931; E-mail: mhsiao@gate.sinica.edu.tw

21

22

Figure S3.

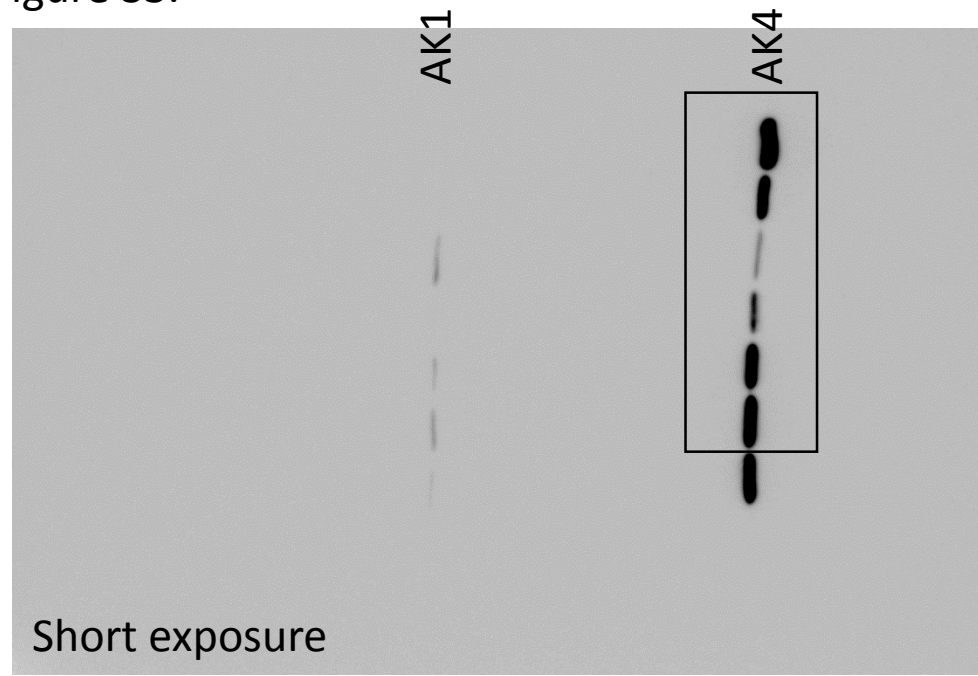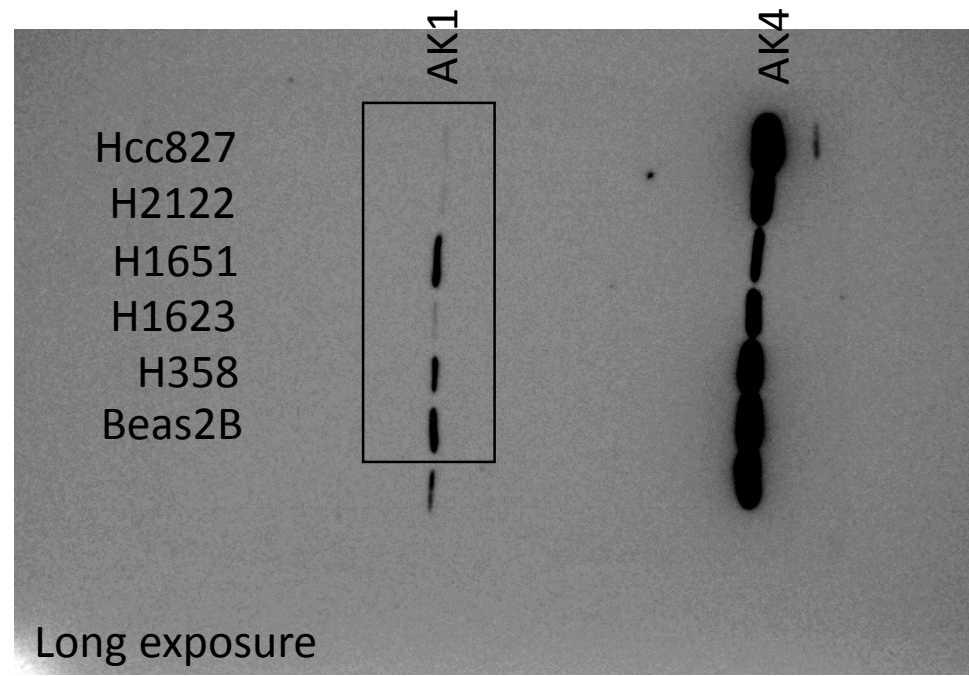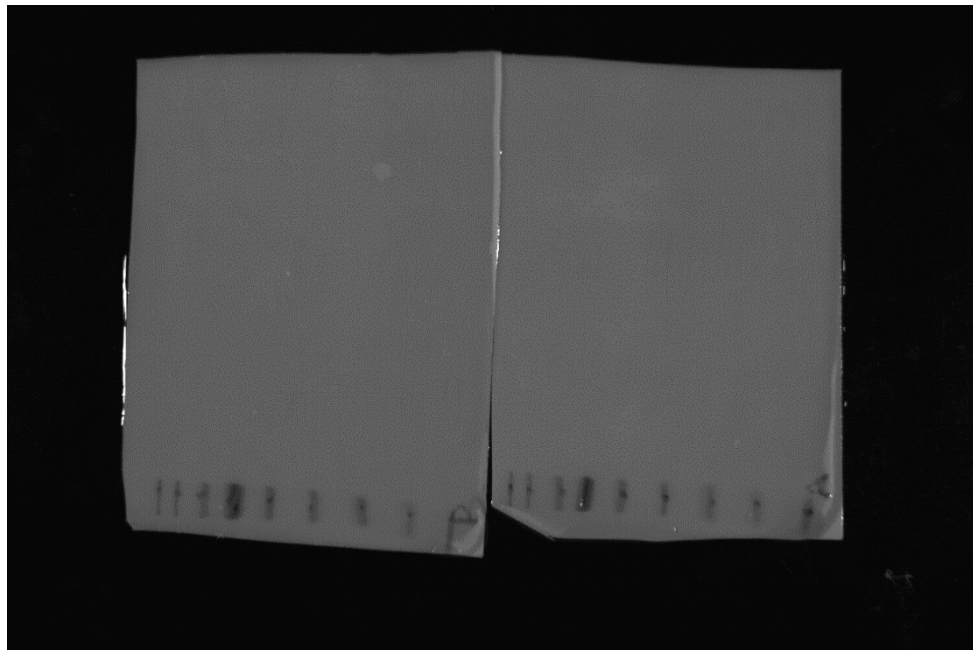

Figure S3.

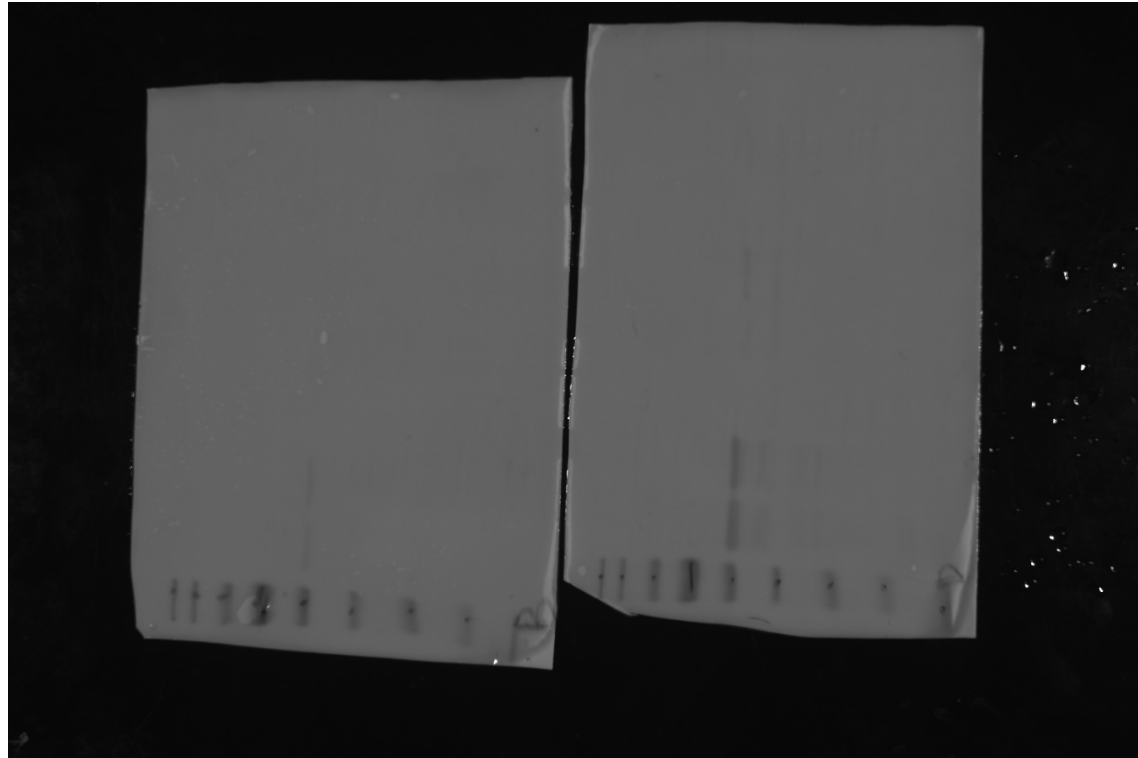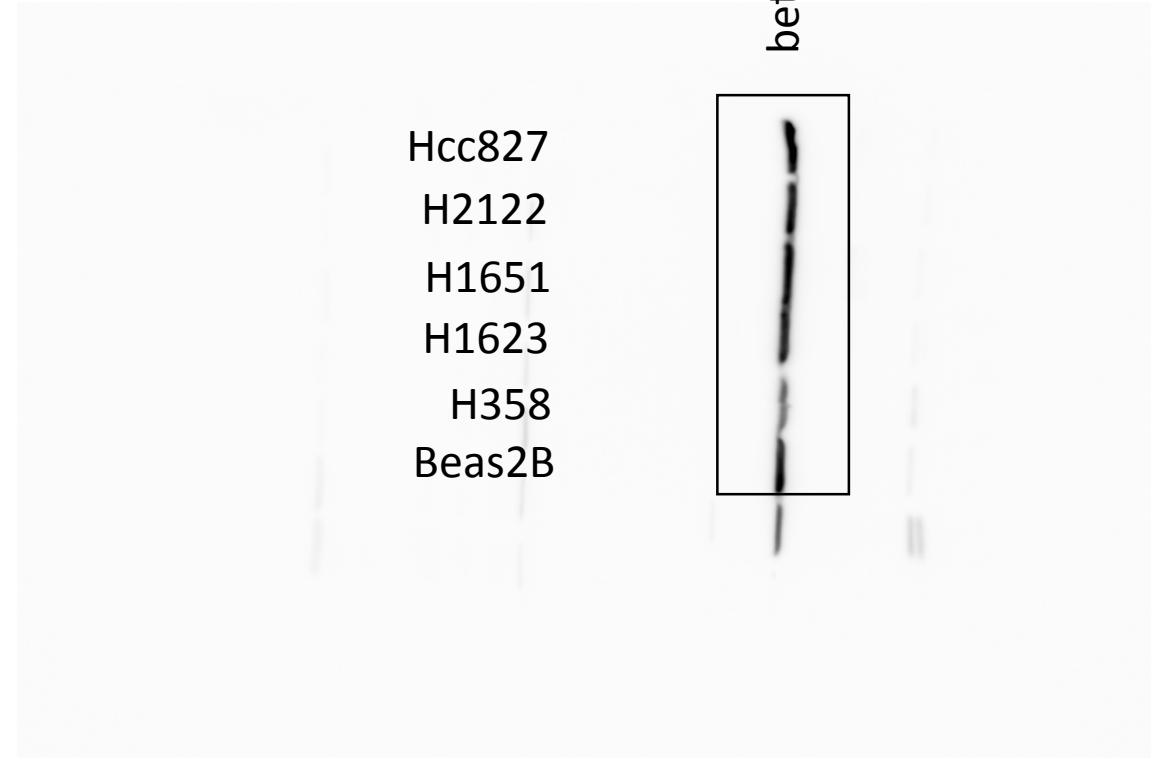

Fig 5.

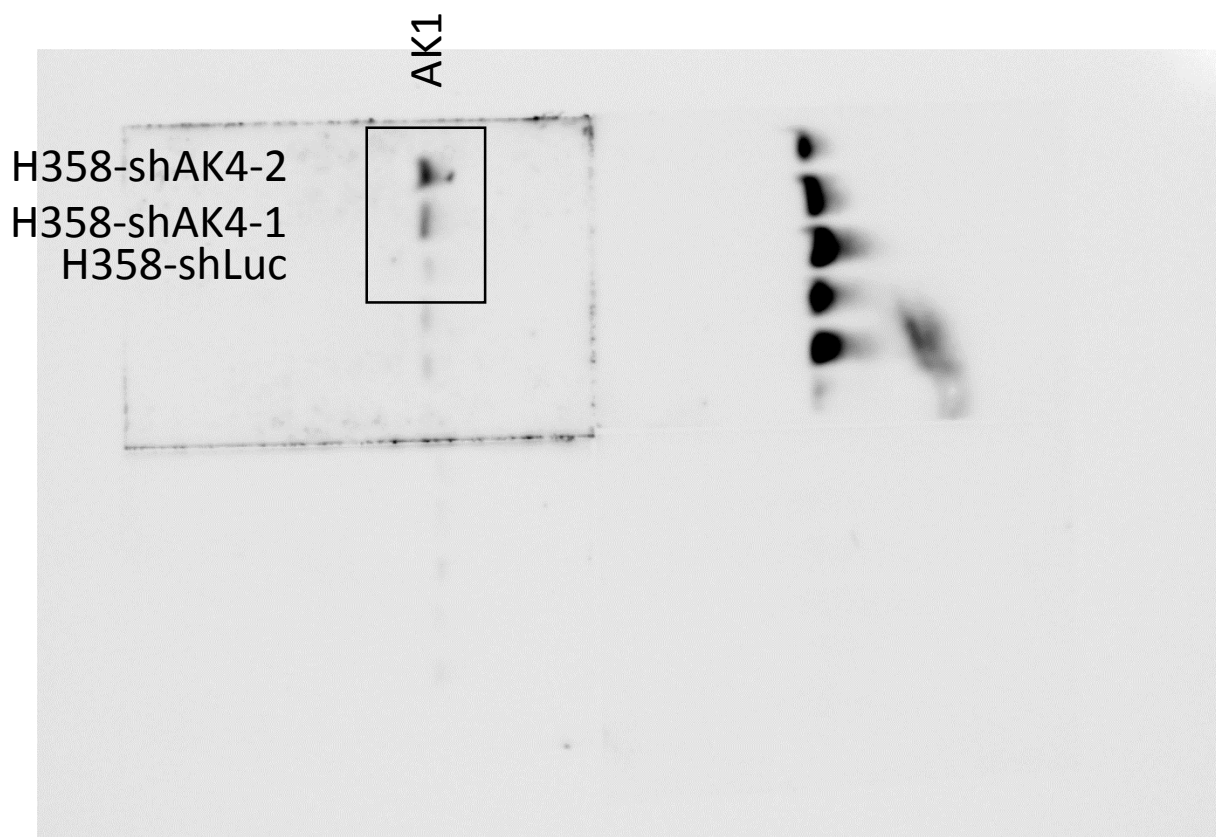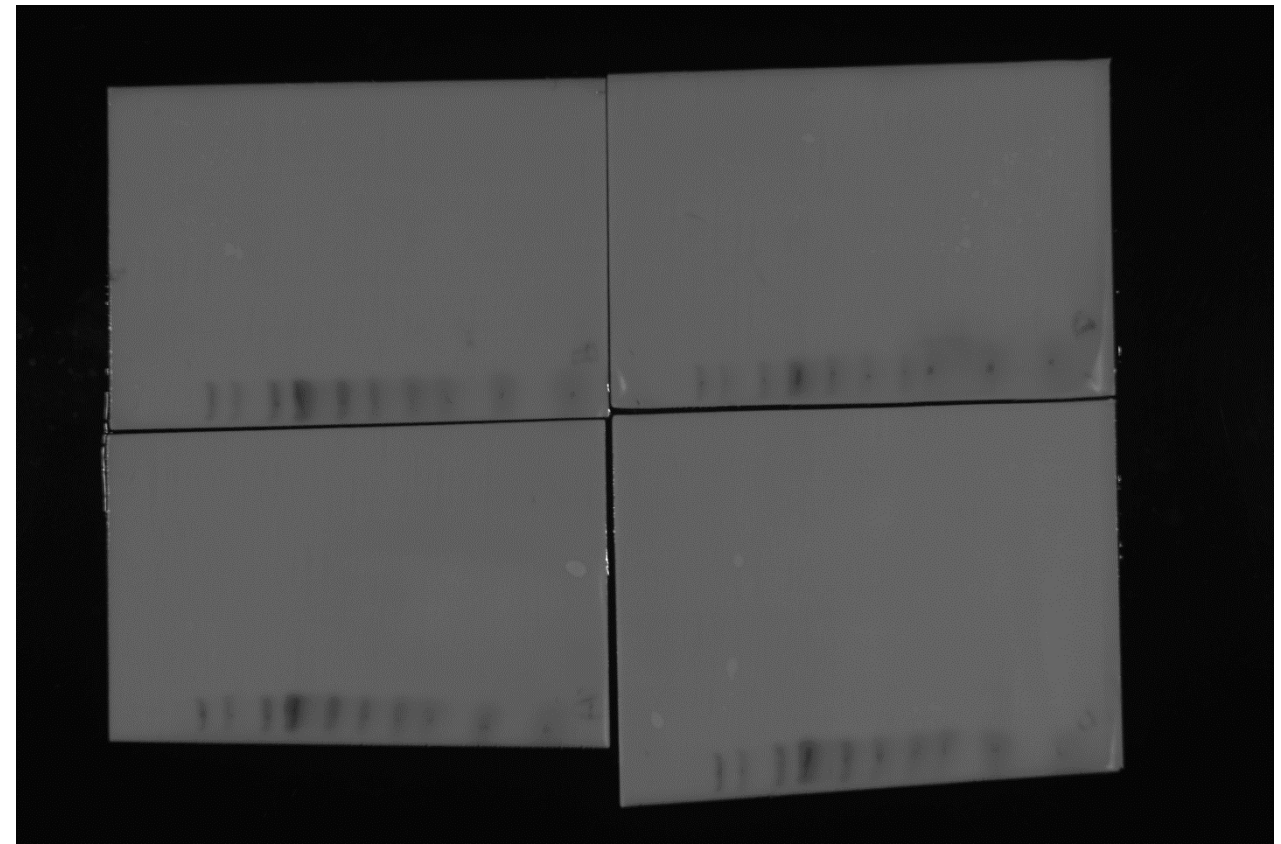

Fig 5.

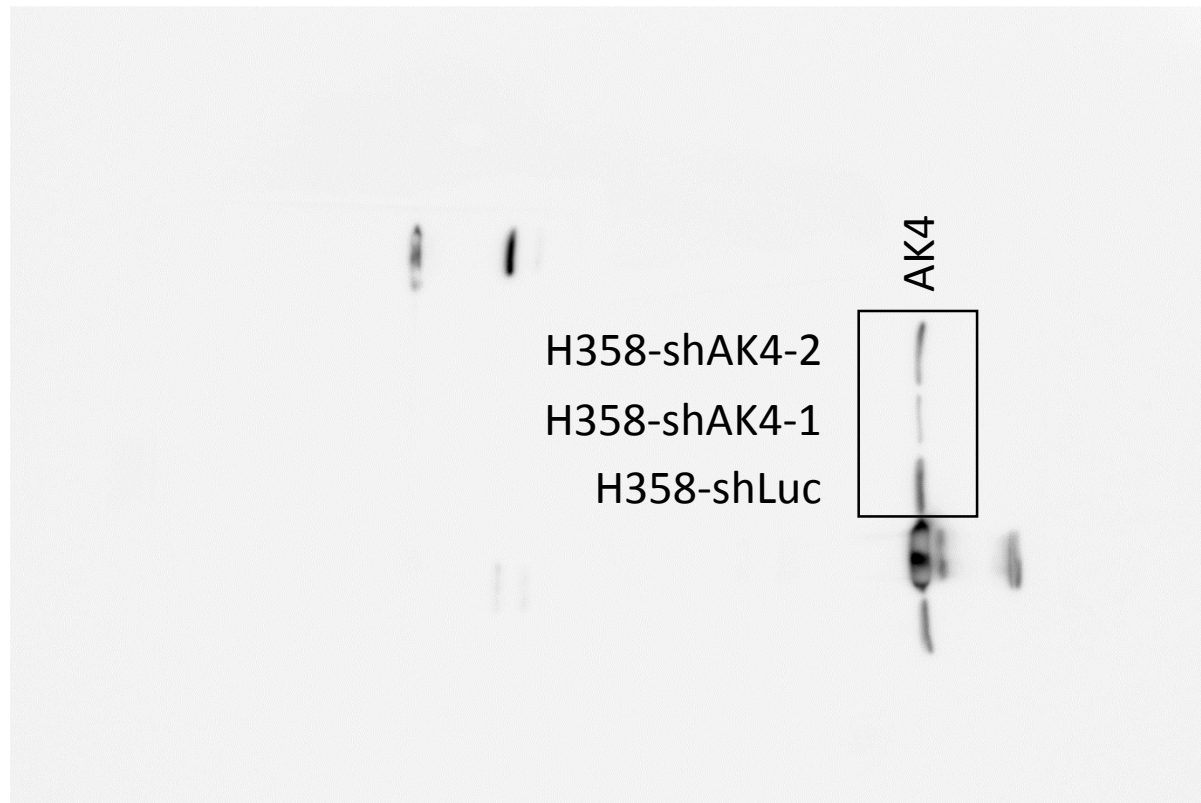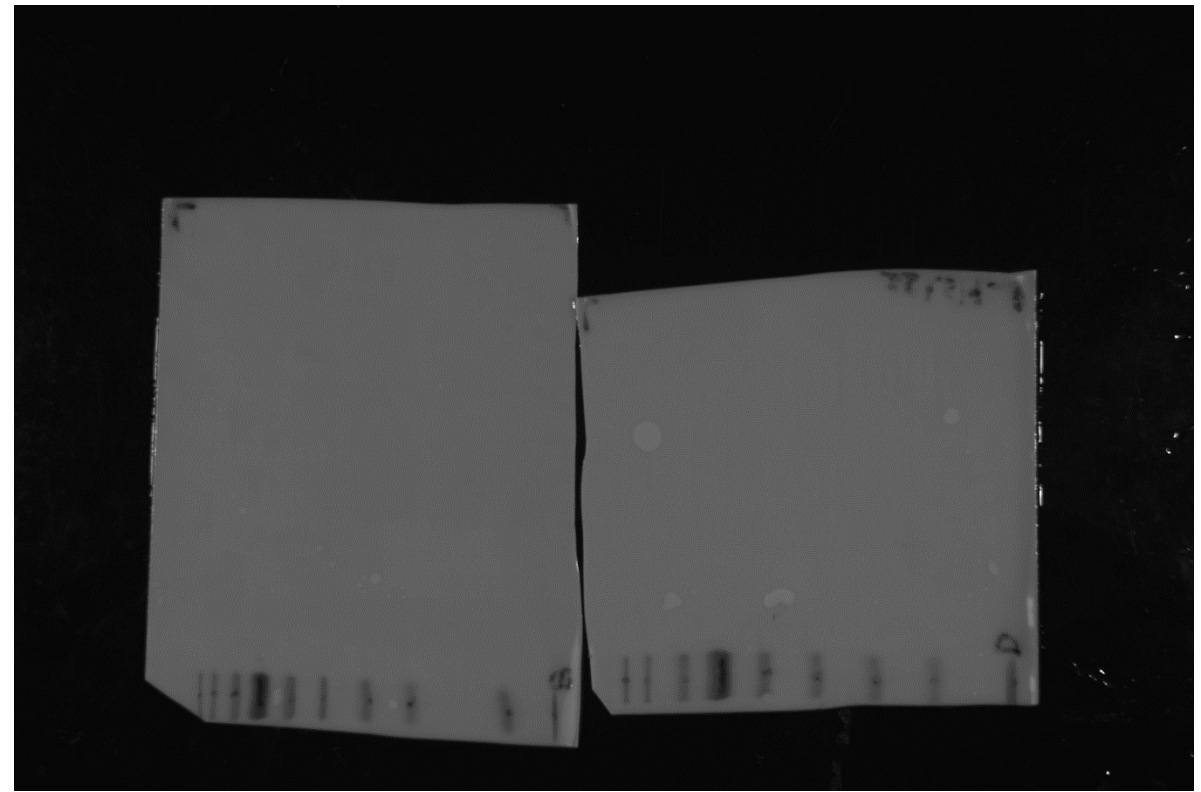

Fig 5.

H358-shAK4-2  
H358-shAK4-1  
H358-shLuc

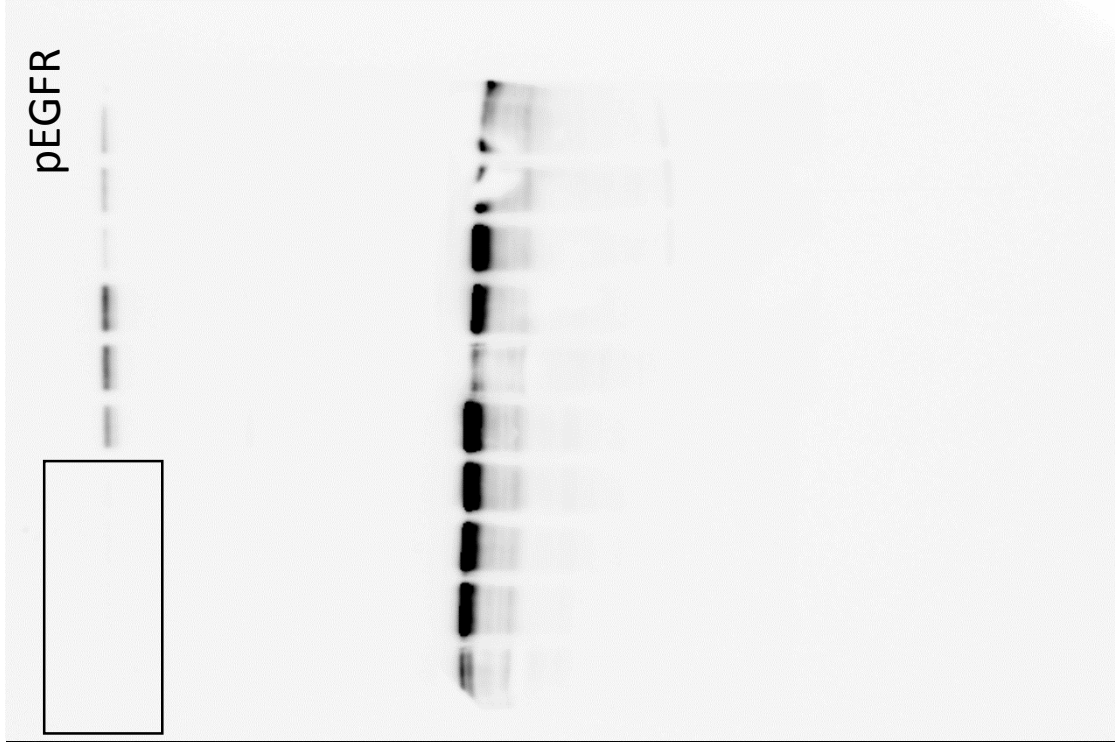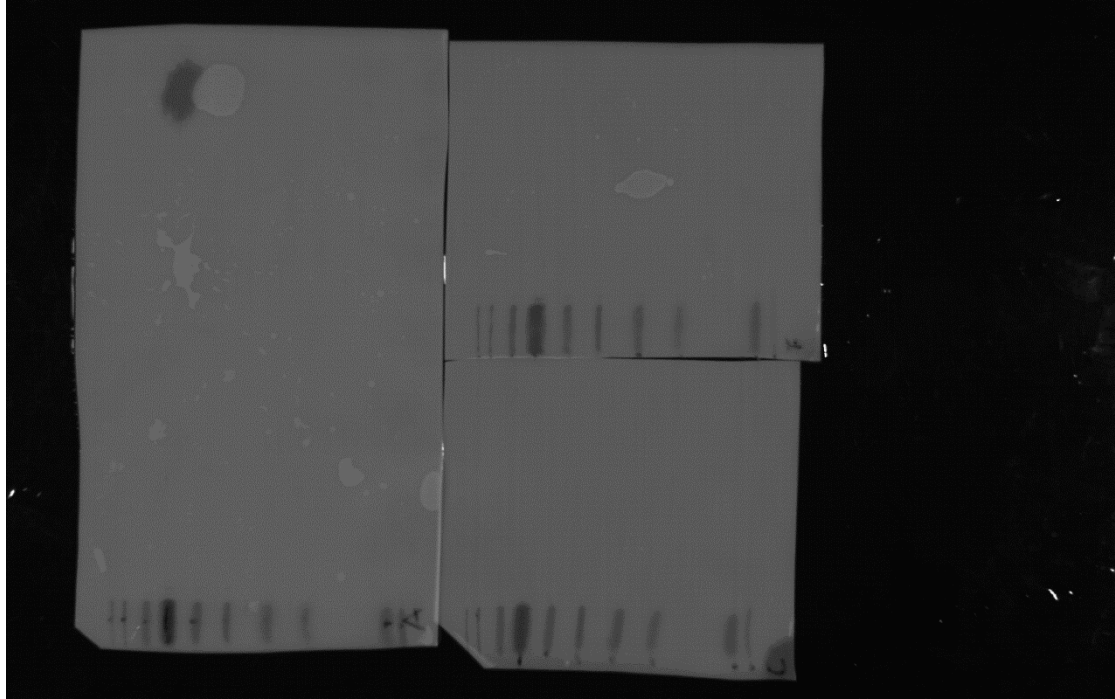

Fig 5.

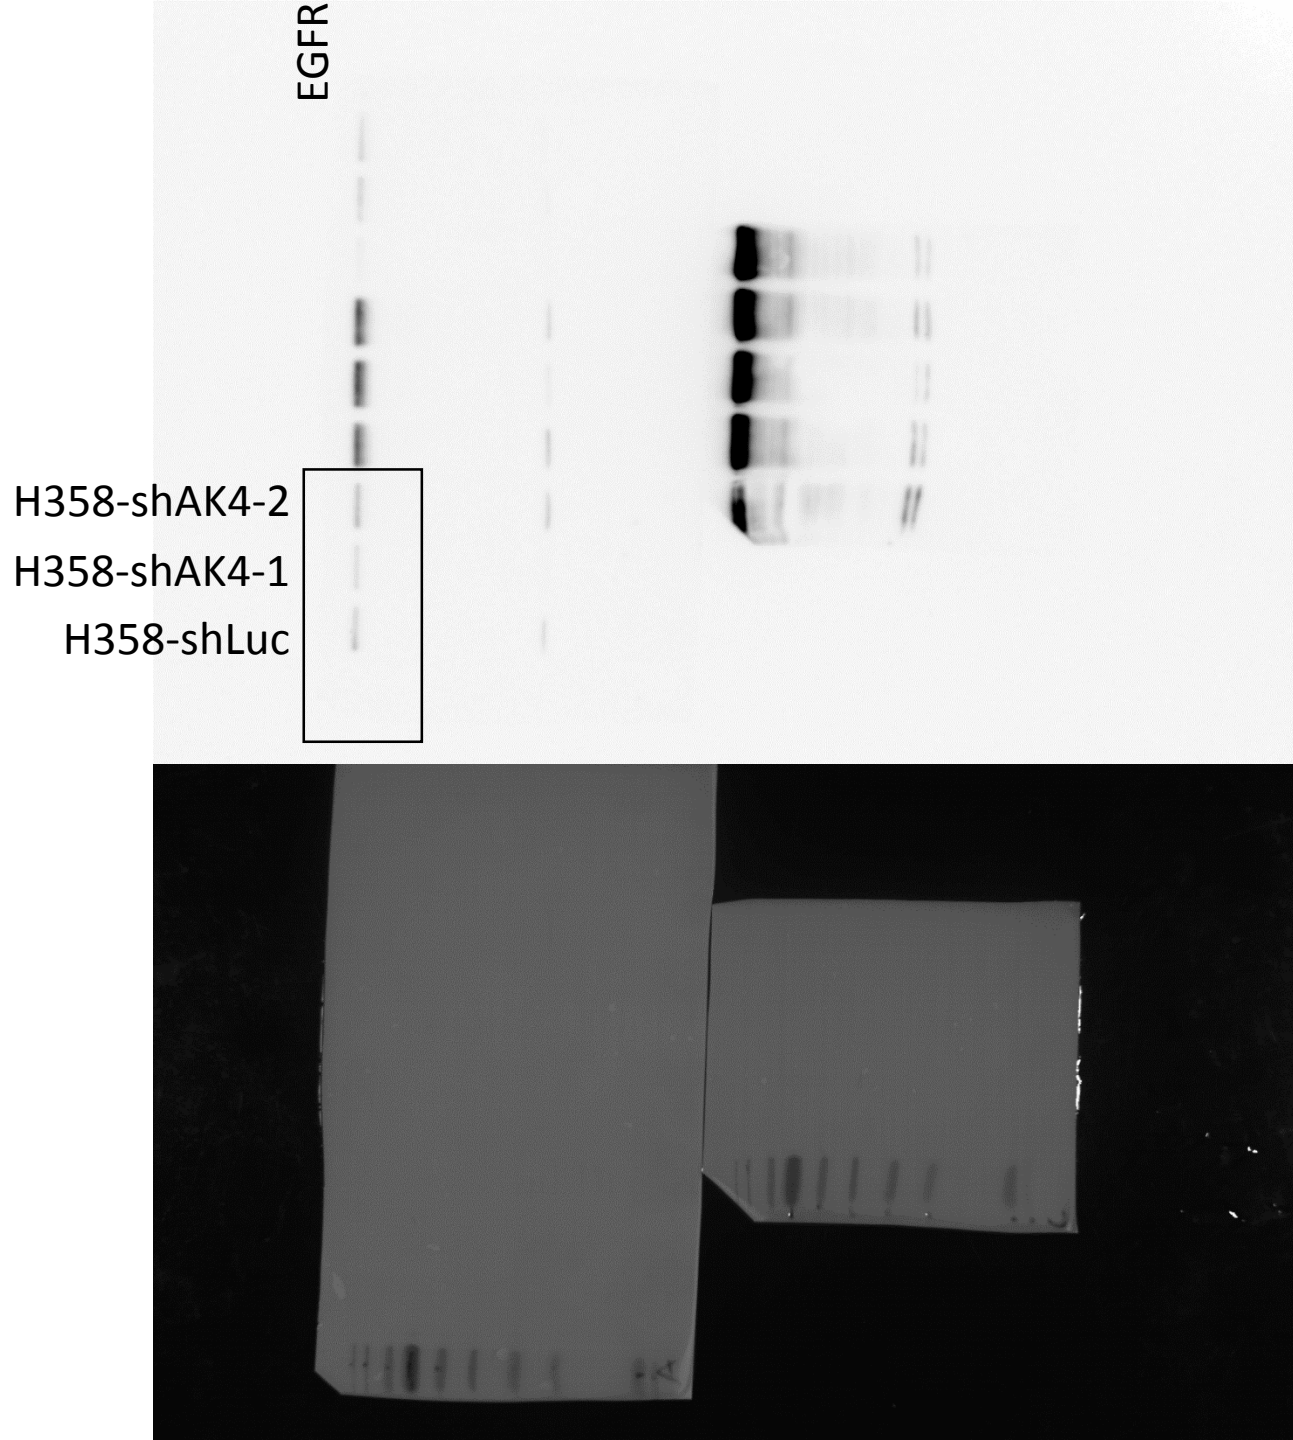

Fig 5.

beta-actin

H358-shAK4-2  
H358-shAK4-1  
H358-shLuc

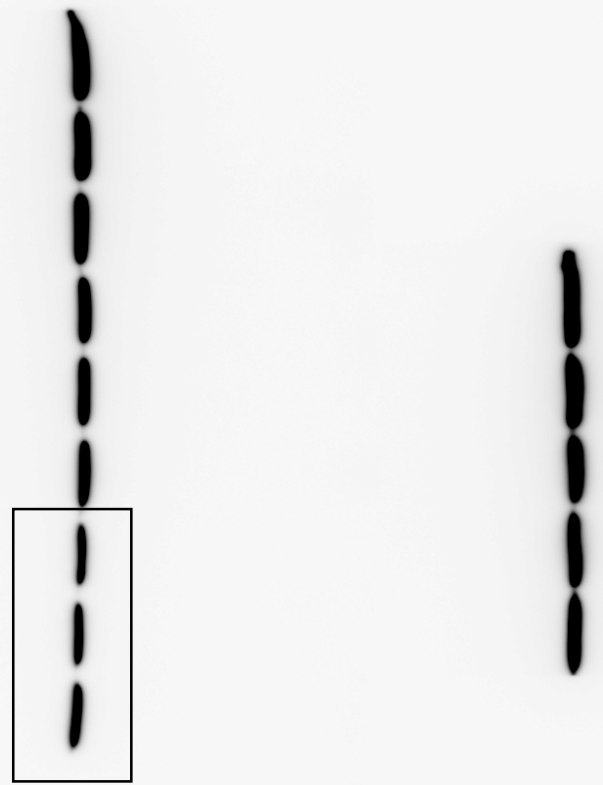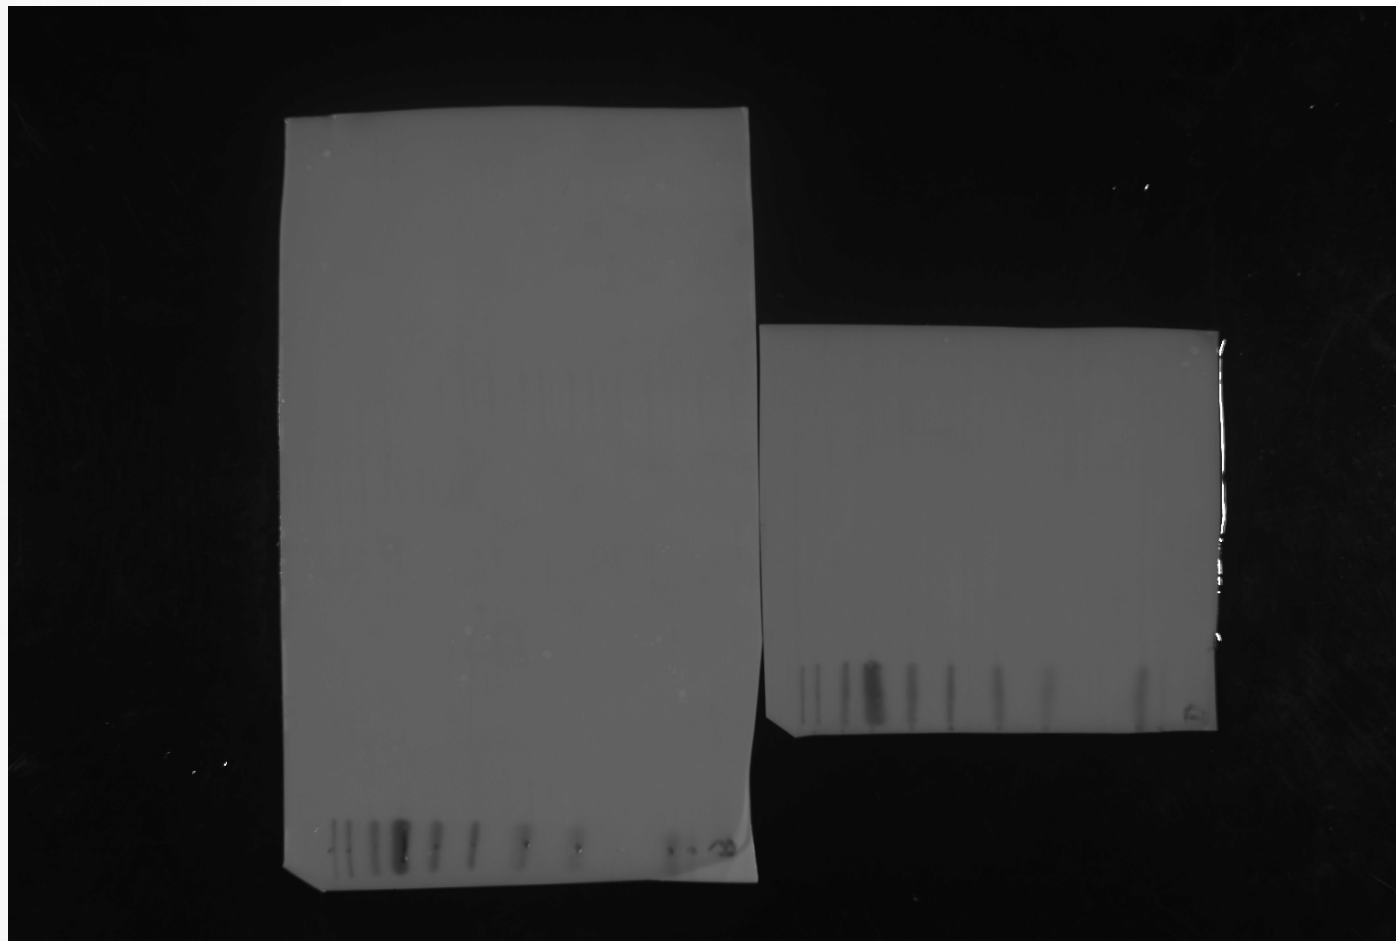



Fig 5.

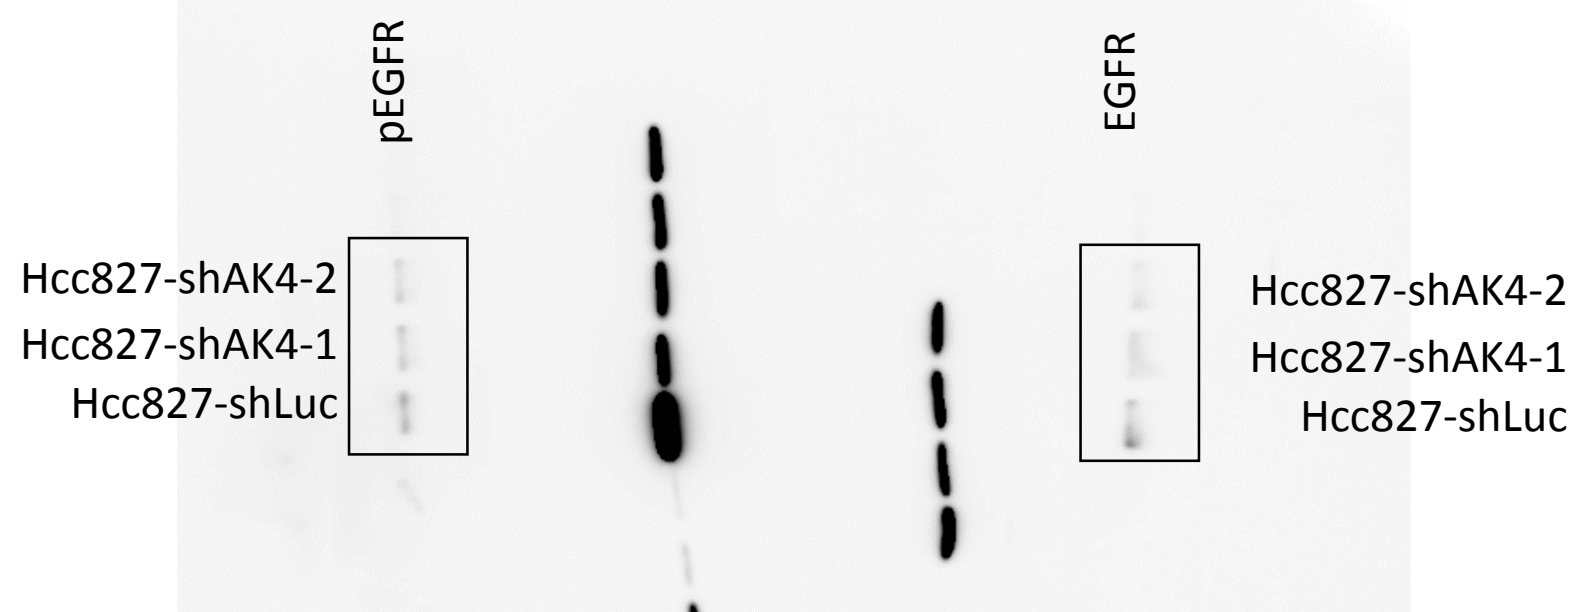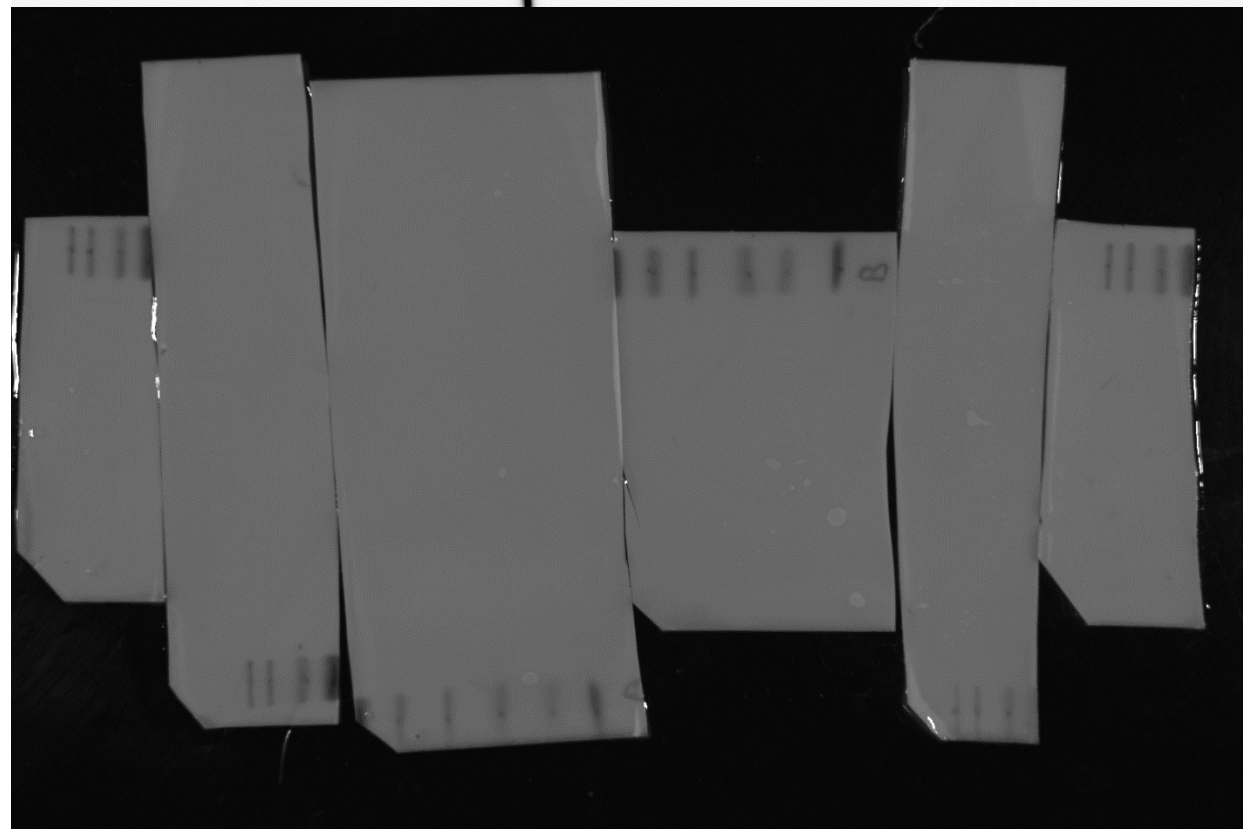

Fig 5.

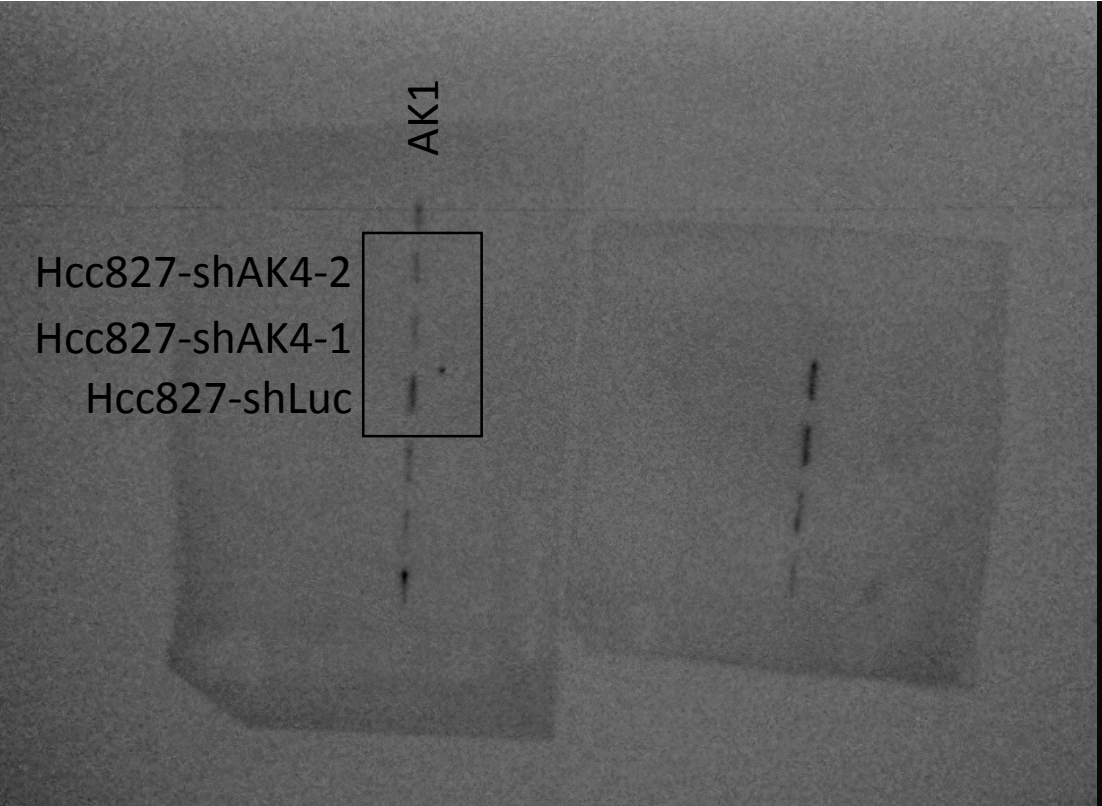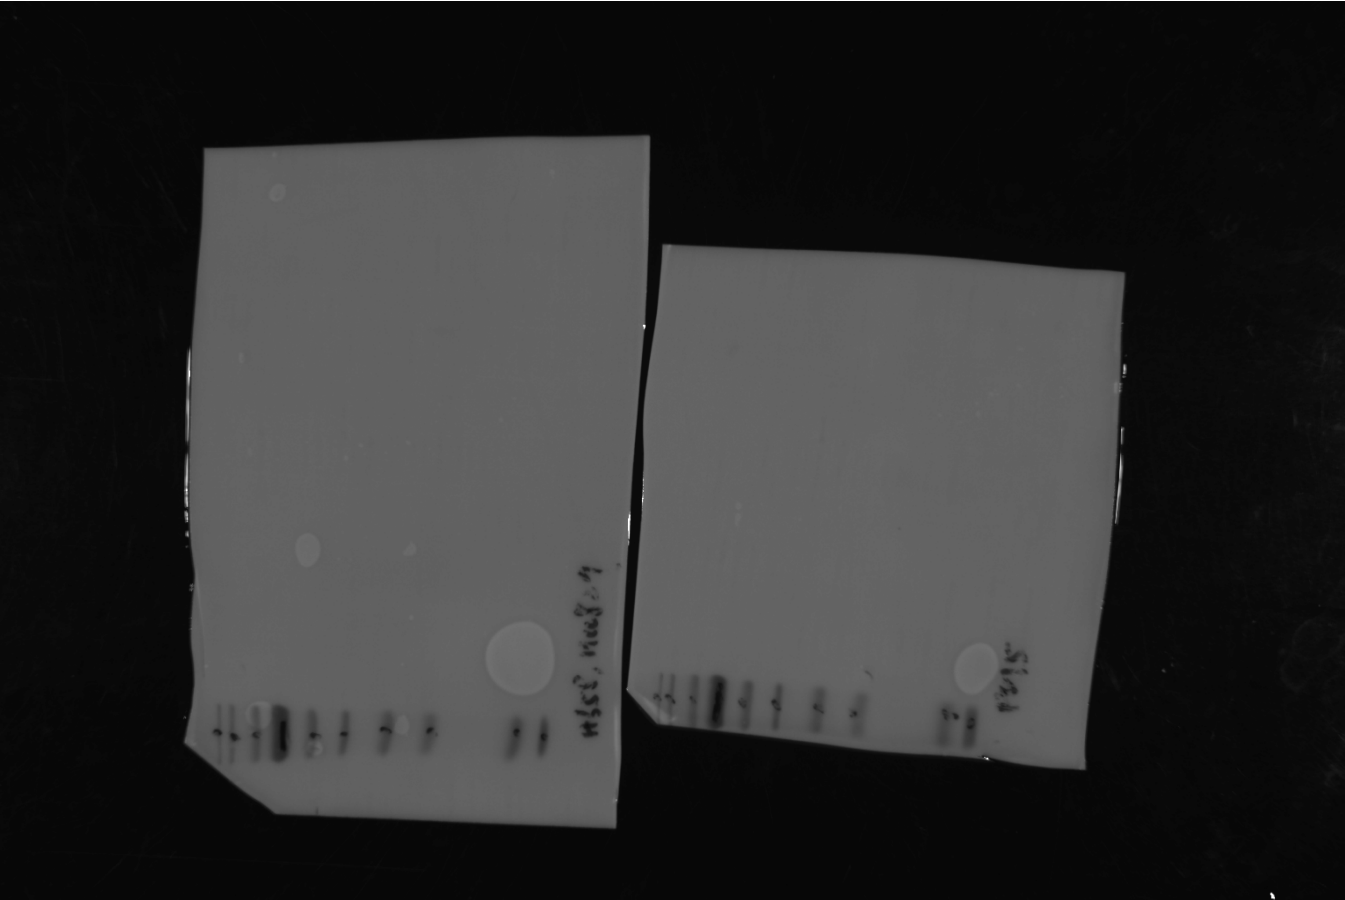

Fig 5.

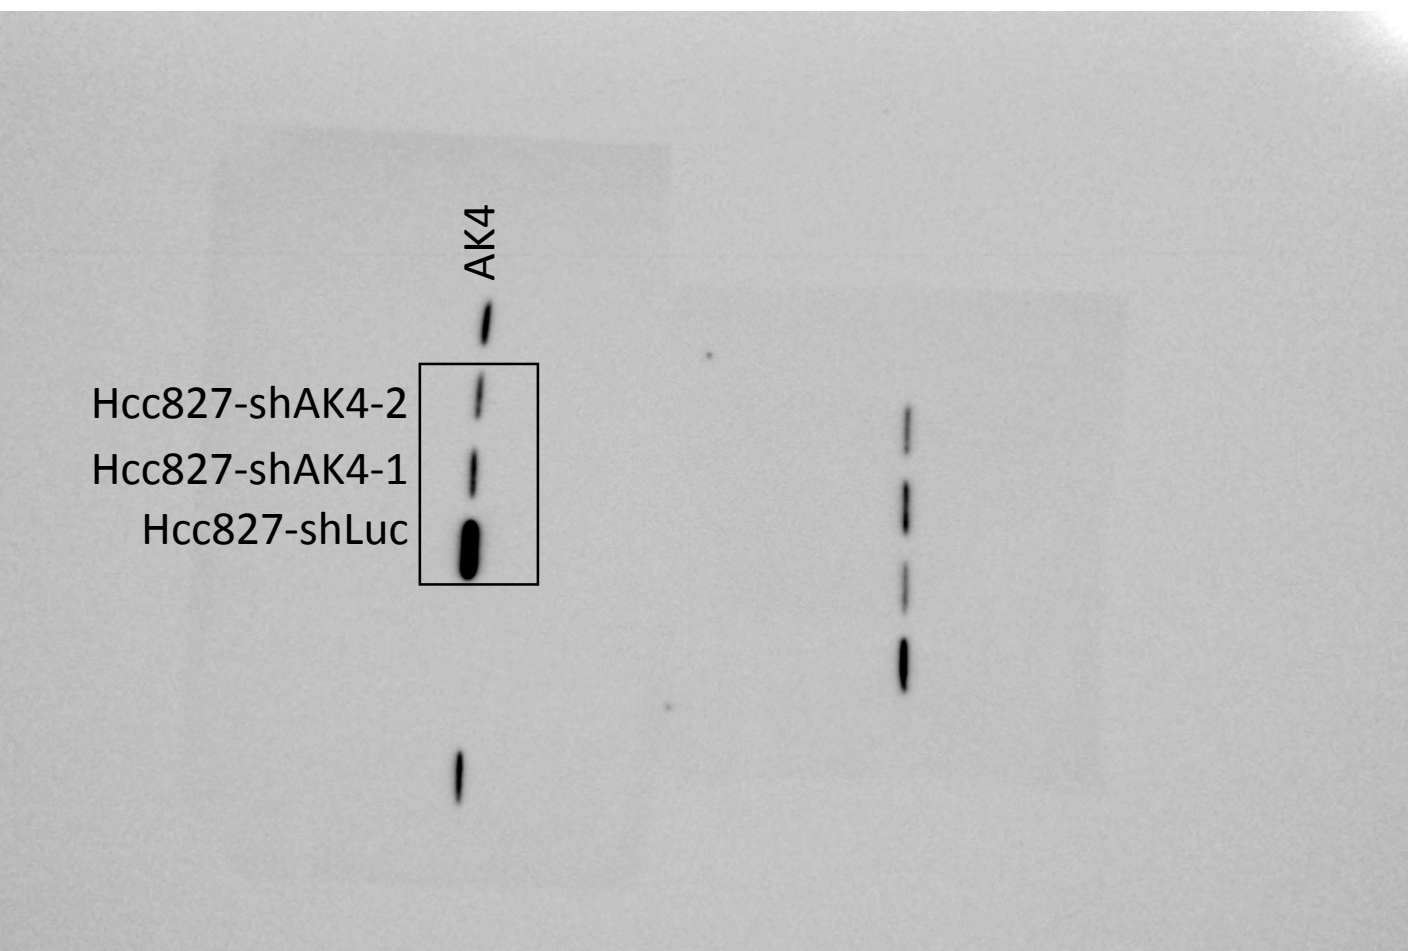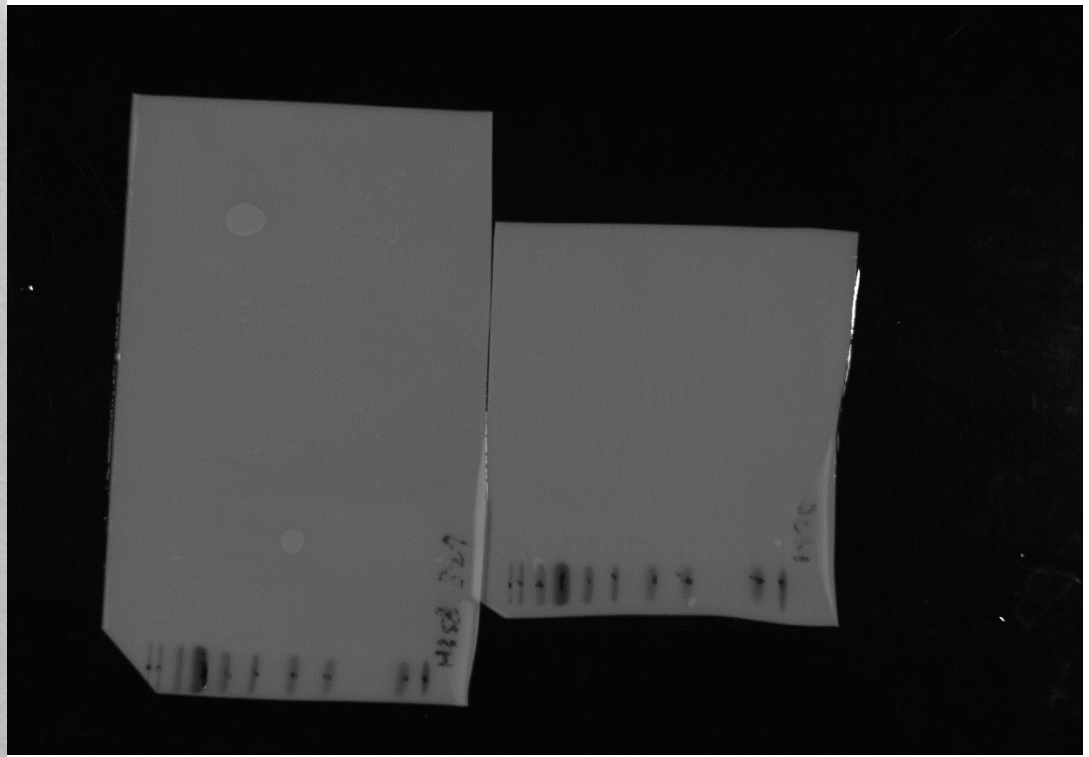

Fig 5.

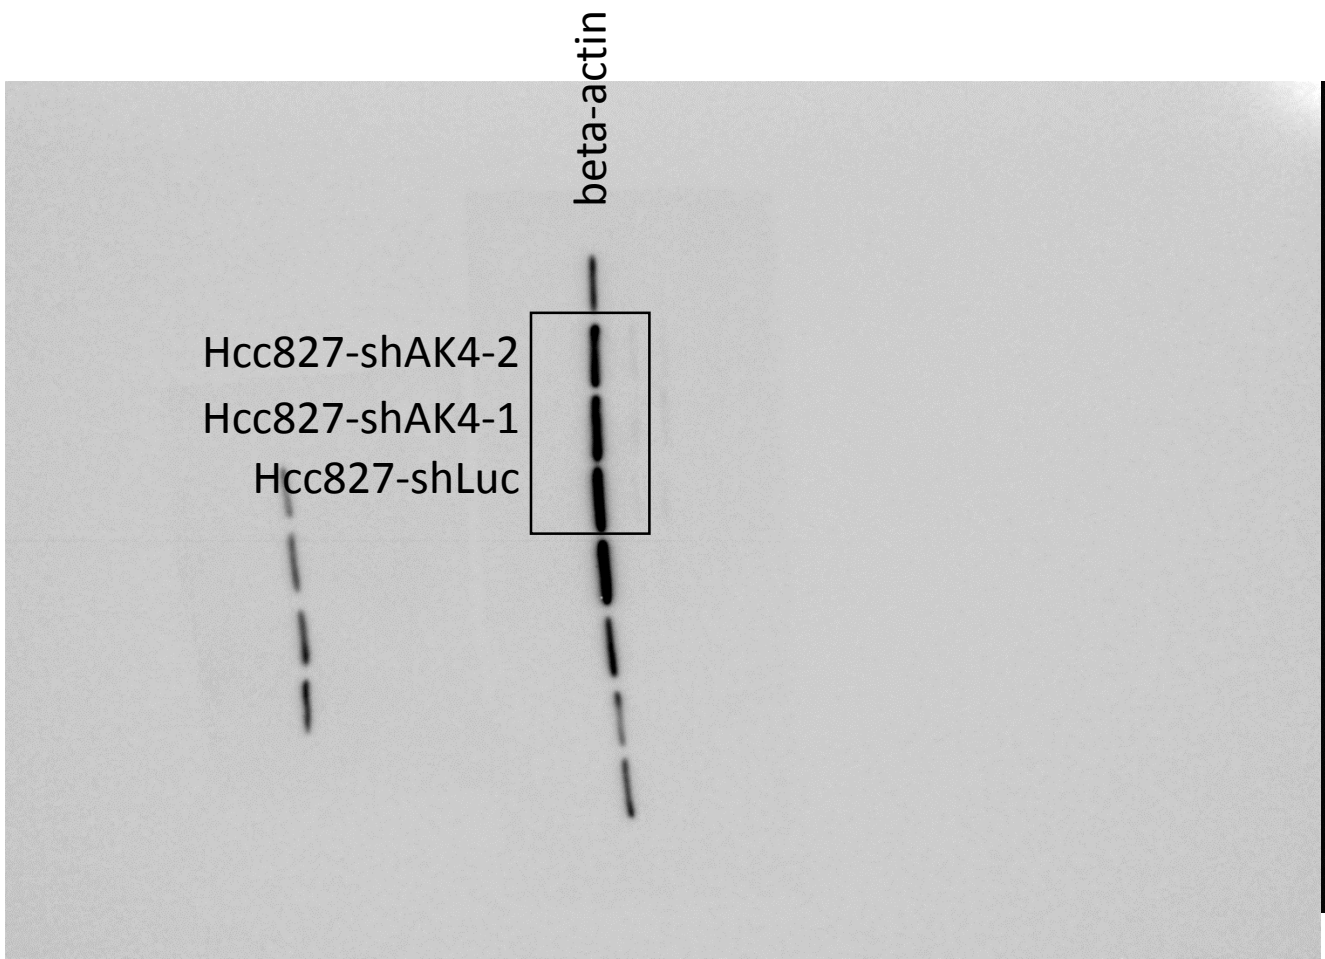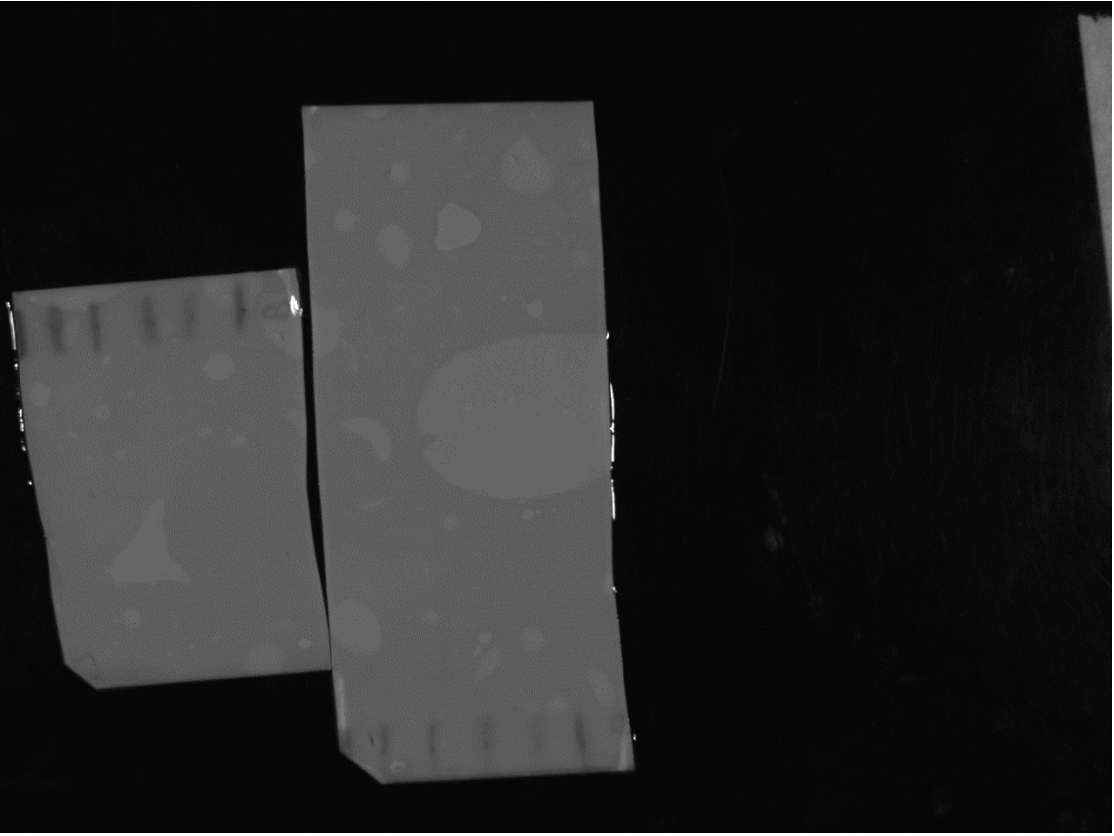

Supplement: 41598_2019_48243_MOESM6_ESM.pdf [file 41598_2019_48243_MOESM6_ESM.pdf]
